# Supplementary material for: The Effect of Autologous Activated Platelet Rich Plasma (AA-PRP) Injection on Pattern Hair Loss: Clinical and Histomorphometric Evaluation
Source: Biomed Res Int. 2014 May 6;2014:760709. doi: 10.1155/2014/760709 (PMC4032742; doi:10.1155/2014/760709)
Supplement: Supplementary file 1 — Hair growth parameters (hair count, hair density, terminal hair density, vellus hair density) of each patient assessed by TrichoScan analysis for the treatment and control half-head areas at baseline and after 14 weeks. [file 760709.f1.xlsx]

## Sheet: Case 1
Trichogram
Baseline	Hair count	Hair density [1/cm2]	Velllus hair density [1/cm2]	Terminal hair density [1/cm2]	Vellus hair count	(%)	Terminal hair count	(%)
Dx.	115.5	177.4	7.7	169.7	5	0.043	110.5	0.957
Sin.	116	178.2	13.1	165.1	8.5	0.073	107.5	0.927
T1
Dx.	126	193.8	13.1	180.7	5	0.0397	121	0.9603
Sin.	114	175.1	9.2	165.9	6	0.053	108	0.947
Diff Dx.	10.5	16.4	5.4	11	0	-0.0033	10.5	0.0033
Diff. Sin.	-2	-3.1	-3.9	0.8	-2.5	-0.02	0.5	0.02

## Sheet: Case 2
Trichogram
Baseline	Hair count	Hair density [1/cm2]	Velllus hair density [1/cm2]	Terminal hair density [1/cm2]	Vellus hair count	(%)	Terminal hair count	(%)
Dx.	165	237.3	10	227.3	6.5	0.042	148	0.958
Sin.	178	259.6	8.4	251.1	5.5	0.033	163.5	0.967
T1
Dx.	192	281.9	10.8	271.1	7	0.038	176.5	0.962
Sin.	171	263.077	10.3	252.8	6.7	0.039	164.3	0.961
Diff. Dx.	27	44.6	0.8	43.8	0.5	-0.004	28.5	0.004
Diff. Sin.	-7	3.47692	1.9	1.7	1.2	0.006	0.8	-0.006

## Sheet: Case 3
Trichogram
Baseline	Hair count	Hair density [1/cm2]	Velllus hair density [1/cm2]	Terminal hair density [1/cm2]	Vellus hair count	(%)	Terminal hair count	(%)
Dx.	81.5	125.2	4.6	120.6	3	0.037	78.5	0.963
Sin.	93	142.9	12.3	130.6	8	0.086	85	0.914
T1
Dx.	88.5	135.9	6.9	129	4.5	0.051	84	0.949
Sin.	77.5	119	16.1	102.9	10.5	0.135	67	0.865
Diff.Dx.	7	10.7	2.3	8.4	1.5	0.014	5.5	-0.014
Diff.Sin.	-15.5	-23.9	3.8	-27.7	2.5	0.049	-18	-0.049

## Sheet: Case 4
Trichogram
Baseline	Hair count	Hair density [1/cm2]	Velllus hair density [1/cm2]	Terminal hair density [1/cm2]	Vellus hair count	(%)	Terminal hair count	(%)
Dx.	83.5	128.3	7.7	120.6	5	0.06	78.5	0.94
Sin.	88	135.2	7.7	127.5	5	0.057	83	0.943
T1
Dx.	94	144.4	7.7	136.7	5	0.053	89	0.947
Sin.	82.5	126.7	8.4	118.3	5.5	0.067	77	0.933
Diff.Dx.	10.5	16.1	0	16.1	0	-0.007	10.5	0.007
Diff.Sin.	-5.5	-8.5	0.7	-9.2	0.5	0.01	-6	-0.01

## Sheet: Case 5
Trichogram
Baseline	Hair count	Hair density [1/cm2]	Velllus hair density [1/cm2]	Terminal hair density [1/cm2]	Vellus hair count	(%)	Terminal hair count	(%)
Dx.	117.5	180.5	15.4	165.1	10	0.085	107.5	0.915
Sin.	119.5	183.6	15.4	168.2	10	0.084	109.5	0.916
T1
Dx.	129.5	198.9	19.2	179.7	12.5	0.097	117	0.903
Sin.	120.5	185.385	14.6	170.8	9.5	0.079	111	0.921
Diff.Dx.	12	18.4	3.8	14.6	2.5	0.012	9.5	-0.012
Diff.Sin.	1	1.78462	-0.8	2.6	-0.5	-0.005	1.5	0.005

## Sheet: Case 6
Trichogram
Baseline	Hair count	Hair density [1/cm2]	Velllus hair density [1/cm2]	Terminal hair density [1/cm2]	Vellus hair count	(%)	Terminal hair count	(%)
Dx.	57.5	88.3	12.3	76	8	0.139	49.5	0.861
Sin.	78.5	120.6	10	110.6	6.5	0.083	72	0.917
T1
Dx.	77.5	119	16.1	102.9	10.5	0.135	67	0.865
Sin.	88.5	135.9	6.9	129	4.5	0.051	84	0.949
Diff. Dx.	20	30.7	3.8	26.9	2.5	-0.004	17.5	0.004
Diff.Sin.	10	15.3	-3.1	18.4	-2	-0.032	12	0.032

## Sheet: Case 7
Trichogram
Baseline	Hair count	Hair density [1/cm2]	Velllus hair density [1/cm2]	Terminal hair density [1/cm2]	Vellus hair count	(%)	Terminal hair count	(%)
Dx.	74.5	114.4	6.1	108.3	4	5.4	70.5	94.6
Sin.	82.5	126.7	8.4	118.3	5.5	6.7	77	93.3
T1
Dx.	94	144.4	7.7	136.7	5	5.3	89	94.7
Sin.	83	127.5	1.5	126	1	1.2	82	98.8
Diff. Dx.	19.5	30	1.6	28.4	1		18.5
Diff.Sin.	0.5	0.8	-6.9	7.7	-4.5		5

## Sheet: Case 8
Trichogram
Baseline	Hair count	Hair density [1/cm2]	Velllus hair density [1/cm2]	Terminal hair density [1/cm2]	Vellus hair count	(%)	Terminal hair count	(%)
Dx.	128	196.9	29.5	167.4	19.2	0.15	108.8	0.85
Sin.	121	186.2	30.3	155.8	19.7	0.163	101.2	0.837
T1
Dx.	143	220	28	192	18.2	0.127	124.8	0.873
Sin.	119	183.1	28.9	154.2	18.8	0.158	100.2	0.842
Diff. Dx	15	23.1	-1.5	24.6	-1	-0.023	16	0.023
Diff. Sin.	-2	-3.1	-1.4	-1.6	-0.9	-0.005	-1	0.005

## Sheet: Case 9
Trichogram
Baseline	Hair count	Hair density [1/cm2]	Velllus hair density [1/cm2]	Terminal hair density [1/cm2]	Vellus hair count	(%)	Terminal hair count	(%)
Dx.	109.8	168.9	27.56	141.4	17.9	0.163	91.9	0.837
Sin.	118.2	181.8	35.6	146.26	23.2	0.196	95	0.804
T1
Dx.	137.6	211.7	17.6	194.1	11.4	0.083	126.2	0.917
Sin.	124.4	191.4	45.9	145.5	29.9	0.24	94.5	0.76
Diff. Dx.	27.8	42.8	-9.96	52.7	-6.5	-0.08	34.3	0.08
Diff. Sin.	6.2	9.6	10.3	-0.76	6.7	0.044	-0.5	-0.044

## Sheet: Case 10
Trichogram
Baseline	Hair count	Hair density [1/cm2]	Velllus hair density [1/cm2]	Terminal hair density [1/cm2]	Vellus hair count	(%)	Terminal hair count	(%)
Dx.	103	158.5	27.4	131.06	17.8	0.173	85.18	0.827
Sin.	118	181.56	28	153.6	18.17	0.154	99.83	0.846
T1
Dx.	134	206.2	31.4	174.8	20.4	0.152	113.6	0.848
Sin.	112.5	173.1	32.2	140.9	20.93	0.186	91.58	0.814
Diff. Dx.	31	47.7	4	43.74	2.6	-0.021	28.42	0.021
Diff. Sin.	-5.5	-8.46	4.2	-12.7	2.76	0.032	-8.25	-0.032

[truncated: 1 more sheets: TABLES]
